# Supplementary material
Source: publisher figshare collection journal article supplement (https://frontiersin.figshare.com/ndownloader/files/12418274)
Supplement: Supplementary file [file 12418274]

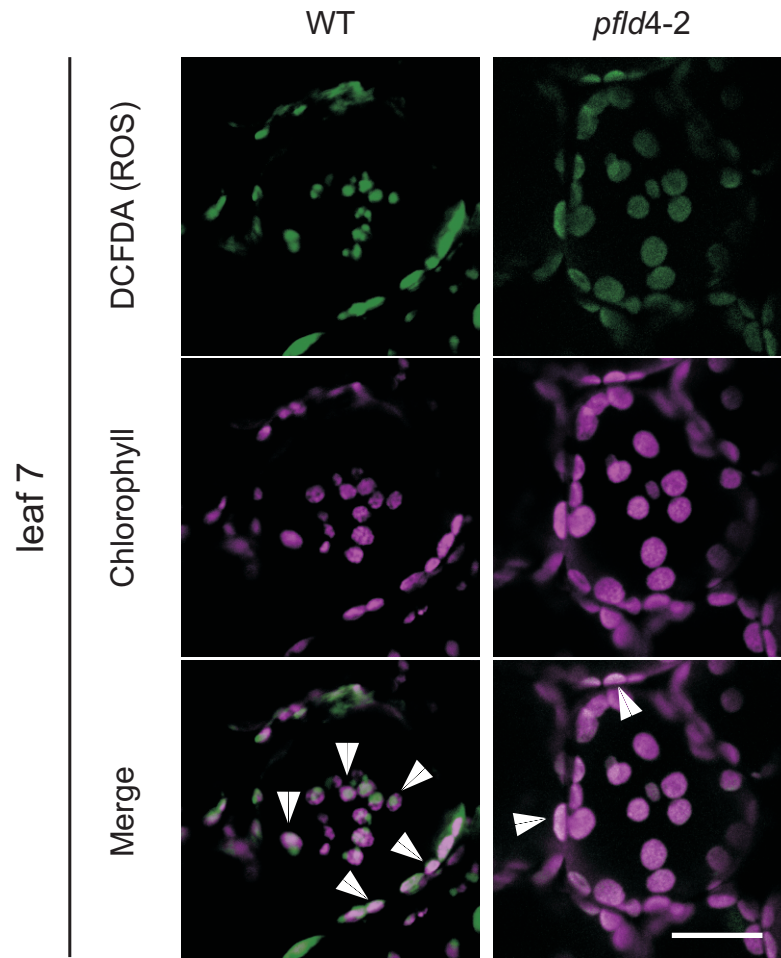

**Supplementary Figure S5.** Expression of a plastid-targeted Fld in transgenic tobacco suppressed ROS build-up in chloroplasts of ageing leaves. Magnification of leaf 7 tissue stained with the ROS-sensitive probe DCFDA to show a single cell of WT and *pfl4-2* genotypes. Bar = 20  $\mu$ m. ROS (green), chlorophyll (magenta) and merge images are shown. Arrowheads show merge of *Chl* and ROS-derived signals in chloroplasts. All other conditions are those indicated in the legend to Figure 3.
